# Supplementary material for: A poly(ethylene glycol)-brush decorated magnetic polymer for highly specific enrichment of phosphopeptides
Source: Royal Society of Chemistry journal article supplement (doi:10.1039/c2sc20363d), 2012-01-01
Supplement: c2sc20363d.pdf [file c2sc20363d.pdf]

## Supporting Information

### **A poly(ethylene glycol)-brush decorated magnetic polymer for highly specific enrichment of phosphopeptides**

*Liang Zhao, Hongqiang Qin, Zhengyan Hu, Yi Zhang, Ren'an Wu\* and Hanfa Zou\**

National Chromatographic R&A Center, CAS Key Laboratory of Separation Sciences for Analytical Chemistry, Dalian Institute of Chemical Physics, Chinese Academy of Sciences (CAS), Dalian 116023, China

\*To whom correspondence should be addressed:

Prof. Dr. Ren'an Wu

Tel: +86-411-84379576, Fax: +86-411-84379620, Email: [wurenan@dicp.ac.cn](mailto:wurenan@dicp.ac.cn)

&

Prof. Dr. Hanfa Zou

Tel: +86-411-84379610, Fax: +86-411-84379620, E-mail: [hanfazou@dicp.ac.cn](mailto:hanfazou@dicp.ac.cn)

Table S1. Zeta-potential results of  $\text{Fe}_3\text{O}_4@\text{SiO}_2@\text{PEG-Br}^{-1}$ , amine functionalized  $\text{Fe}_3\text{O}_4@\text{SiO}_2@\text{PEG}$  nanoparticles ( $\text{Fe}_3\text{O}_4@\text{SiO}_2@\text{PEG-NH}_2$ ), phosphonate-modified  $\text{Fe}_3\text{O}_4@\text{SiO}_2@\text{PEG}$  nanoparticles ( $\text{Fe}_3\text{O}_4@\text{SiO}_2@\text{PEG-PO}_3^{2-}$ ), and  $\text{Fe}_3\text{O}_4@\text{SiO}_2@\text{PEG-Ti}^{4+}$  nanoparticles for the subsequent modification reactions.

| Functional nanoparticles                                  | Zeta potential( mV) |
|-----------------------------------------------------------|---------------------|
| $\text{Fe}_3\text{O}_4@\text{SiO}_2@\text{PEG-Br}^{-1}$   | -3.73               |
| $\text{Fe}_3\text{O}_4@\text{SiO}_2@\text{PEG-NH}_2$      | +32.7               |
| $\text{Fe}_3\text{O}_4@\text{SiO}_2@\text{PEG-PO}_3^{2-}$ | -18.4               |
| $\text{Fe}_3\text{O}_4@\text{SiO}_2@\text{PEG-Ti}^{4+}$   | +17.2               |

Table S2. The surface compositions of functionalized PEG-decorated magnetic nanoparticle were determined by X-ray photoelectron spectroscopy (XPS) analysis. The C/O ratios for the poly(ethylene glycol) methacrylate brushes of  $\text{Fe}_3\text{O}_4@\text{SiO}_2@\text{PEG}$  nanoparticles (great than the sampling depth of XPS) was 2.3, which is reasonably consistent with the stoichiometry value 2.1 of poly(ethylene glycol) methacrylate. The change of chemical compositions of functionalized PEG-decorated magnetic nanoparticles and the appearance of P and Ti element indicated the  $\text{Fe}_3\text{O}_4@\text{SiO}_2@\text{PEG-Ti}^{4+}$  nanoparticles were successfully synthesized through multiply reactions.

| Functional nanoparticles                                  | XPS chemical compositions (%) |       |      |      |      |      |      |
|-----------------------------------------------------------|-------------------------------|-------|------|------|------|------|------|
|                                                           | C                             | O     | N    | Si   | Fe   | P    | Ti   |
| $\text{Fe}_3\text{O}_4@\text{SiO}_2@\text{PEG}$           | 67.71                         | 29.28 | 1.94 | 0.90 | 0.17 |      |      |
| $\text{Fe}_3\text{O}_4@\text{SiO}_2@\text{PEG-NH}_2$      | 71.27                         | 25.40 | 2.16 | 1.04 | 0.13 |      |      |
| $\text{Fe}_3\text{O}_4@\text{SiO}_2@\text{PEG-PO}_3^{2-}$ | 61.12                         | 32.26 | 2.68 | 0.81 | 0.11 | 2.02 |      |
| $\text{Fe}_3\text{O}_4@\text{SiO}_2@\text{PEG-Ti}^{4+}$   | 44.04                         | 43.43 | 1.66 | 0.88 | 0.11 | 0.92 | 8.95 |

Table S3. Sequences of four standard phosphopeptides and identified phosphopeptides from  $\alpha$ -casein,  $\beta$ -casein and ovalbumin tryptic digest MALDI-TOF MS analysis.

| Protein          | No.            | Amino acid sequence                                   | No. of phosphosite | [M+H] <sup>+</sup> |
|------------------|----------------|-------------------------------------------------------|--------------------|--------------------|
| $\alpha$ -Casein | $\alpha_1$     | TVDME[pS]TEVF                                         | 1                  | 1237.08            |
|                  | $\alpha_2$     | TVD[Mo]ME[pS]TEVF <sup>a</sup>                        | 1                  | 1253.11            |
|                  | $\alpha_3$     | EQL[pS]T[pS]EENSK                                     | 2                  | 1411.90            |
|                  | $\alpha_4$     | VPQLEIVPN[pS]AEER                                     | 1                  | 1660.15            |
|                  | $\alpha_5$     | YLGEYLIVPN [pS]AEER                                   | 1                  | 1832.70            |
|                  | $\alpha_6$     | DIGSE[pS]TEDQAMEDIK                                   | 1                  | 1847.95            |
|                  | $\alpha_7$     | DIG[pS]E[pS]TEDQAMEDIK                                | 2                  | 1927.89            |
|                  | $\alpha_8$     | DIG[pS]E[pS]TEDQA[Mo]EDIK <sup>a</sup>                | 2                  | 1943.89            |
|                  | $\alpha_9$     | YKVPQLEIVPN[pS]AEER                                   | 1                  | 1951.09            |
|                  | $\alpha_{10}$  | KKYKVPQLEIVPN[pS]AEERL                                | 1                  | 2080.00            |
|                  | $\alpha_{11}$  | NTMEHV[pS][pS][pS]EESII[pS]QETYSK                     | 4                  | 2618.93            |
|                  | $\alpha_{12}$  | VNEL[pS]KDIG[pS]E[pS]TEDQAMEDIK                       | 3                  | 2678.02            |
|                  | $\alpha_{13}$  | Q*MEAE[pS]I[pS] [pS] [pS]EEIVPN[pS]VEAQK <sup>b</sup> | 5                  | 2703.75            |
|                  | $\alpha_{14}$  | QMEAE[pS]I[pS][pS][pS]EEIVPNPN[pS]VEQK                | 5                  | 2720.05            |
|                  | $\alpha_{15}$  | Q[Mo]EAE[pS]I[pS][pS][pS]EEIVPNPN[pS]VEQK             | 5                  | 2736.05            |
|                  | $\alpha_{16}$  | KEKVNEL[pS]KDIG[pS]E[pS]TEDQAMEDIKQ                   | 3                  | 2935.87            |
|                  | $\alpha_{17}$  | NANEEYSIG[pS][pS][pS]EE[pS]AEVATEEVK                  | 4                  | 3008.22            |
|                  | $\alpha_{18}$  | NANEEY[pS]IG[pS][pS][pS]EE[pS]AEVATEEVK               | 5                  | 3087.93            |
| $\beta$ -Casein  | $\beta_1$      | FQ[pS]EEQQQTEDELQDK                                   | 1                  | 2061.94            |
|                  | $\beta_2$      | RELEELNVPGEIVE[pS]L[pS][pS][pS]EESITR                 | 4                  | 3122.56            |
| Ovalbumin        | O <sub>1</sub> | EVVG[pS]AEAGVDAASVSEEFR                               | 1                  | 2090.62            |
|                  | O <sub>2</sub> | FDKLPFGFD[pS]IEAQCGTSVNVHSSLR                         | 1                  | 2903.46            |
| ---              | S <sub>1</sub> | NVPL[pY]K                                             | 1                  | 813.39             |
|                  | S <sub>2</sub> | HLADL[pS]K                                            | 1                  | 863.40             |
|                  | S <sub>3</sub> | VNQIGTL[pS]E[pS]IK                                    | 2                  | 1448.64            |
|                  | S <sub>4</sub> | VNQIG[pT]LSESIK                                       | 1                  | 1368.68            |

Notes: Superscripts: a) Oxidation on methionine; b) Pyroglutamylation on the N-terminal Q\*.

Subscript: [pS] phosphorylated site.

Fig. S1 TGA curves of (a)  $\text{Fe}_3\text{O}_4@\text{SiO}_2$ ; (b)  $\text{Fe}_3\text{O}_4@\text{SiO}_2\text{-Br}$ ; (c)  $\text{Fe}_3\text{O}_4@\text{SiO}_2@\text{PEG}$ , respectively. TGA was carried out in nitrogen at a heating rate of  $35^\circ\text{C}/10$  min. For the relative mass increase of  $\text{Fe}_3\text{O}_4@\text{SiO}_2@\text{PEG}$  nanoparticles and  $\text{Fe}_3\text{O}_4@\text{SiO}_2\text{-Br}$  nanoparticles were calculated from formula:  $[(1 - W_{pp})/W_{pp} - (1 - W_{ip})/W_{ip}] \times 100\%$ , where  $W_{pp}$  and  $W_{ip}$  represent the percent weight retention at  $600^\circ\text{C}$  of  $\text{Fe}_3\text{O}_4@\text{SiO}_2@\text{PEG}$  nanoparticles and  $\text{Fe}_3\text{O}_4@\text{SiO}_2\text{-Br}$  nanoparticles or  $\text{Fe}_3\text{O}_4@\text{SiO}_2\text{-Br}$  nanoparticles and  $\text{Fe}_3\text{O}_4@\text{SiO}_2$  nanoparticles, respectively. Assuming the magnetic nanoparticles were monodisperse with a spherical shape and considering the density of  $\text{Fe}_3\text{O}_4@\text{SiO}_2$  was  $5.18 \text{ g/cm}^3$ <sup>1</sup>, the grafting density of PEG brushes and initiator bromide were calculated according to a literature<sup>2</sup>.

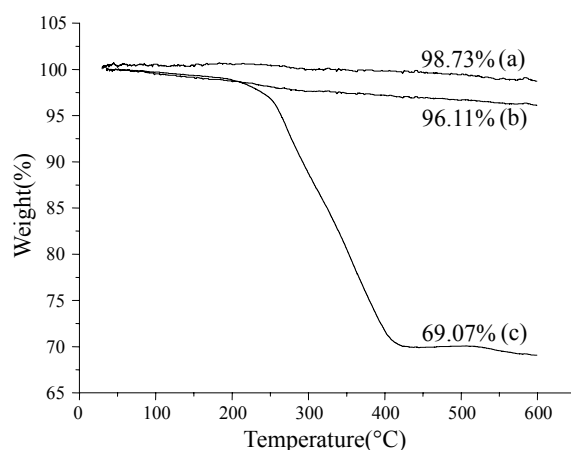

Fig. S2 FT-IR spectra of (a)  $\text{Fe}_3\text{O}_4@\text{SiO}_2\text{-Br}$  (b)  $\text{Fe}_3\text{O}_4@@\text{SiO}_2\text{PEG}$ , respectively. Fig.S3a showed that the magnetite particles exhibit strong bands in the low-frequency region ( $440$  and  $578\text{ cm}^{-1}$ ) due to the iron oxide skeleton, and the peaks of Si-O-Si stretching vibrations center at  $1081\text{ cm}^{-1}$ ; the stretching vibrations of  $\text{-C=O}$  from amide occur at  $1650\text{ cm}^{-1}$ , which confirms the attachment of initiator Br on the  $\text{Fe}_3\text{O}_4@\text{SiO}_2$  nanoparticles. After large quantities of PEG brushes are grown on the surface of  $\text{Fe}_3\text{O}_4@\text{SiO}_2\text{-Br}$  nanoparticles, the C-H stretching bands emerge at  $2950$ ,  $2870\text{ cm}^{-1}$  and the C=O stretching bands show a strong bands at  $1720\text{ cm}^{-1}$  in the spectrum. The presence of C=O and  $\text{CH}_2$  adsorption bands provide strong evidence that the PEG brushes were successfully coated on the  $\text{Fe}_3\text{O}_4@\text{SiO}_2\text{-Br}$  nanoparticles.

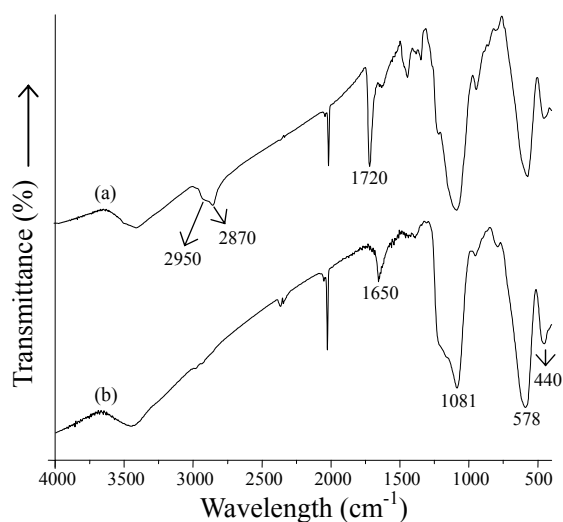

Figure S3. Wide-scan XPS spectra of the functionalized magnetic nanoparticles: (a)  $\text{Fe}_3\text{O}_4@\text{SiO}_2@\text{PEG}$ ; (b)  $\text{Fe}_3\text{O}_4@\text{SiO}_2@\text{PEG-NH}_2$ ; (c)  $\text{Fe}_3\text{O}_4@\text{SiO}_2@\text{PEG-PO}_3^{2-}$ ; (d)  $\text{Fe}_3\text{O}_4@\text{SiO}_2@\text{PEG-Ti}^{4+}$  magnetic nanoparticles.

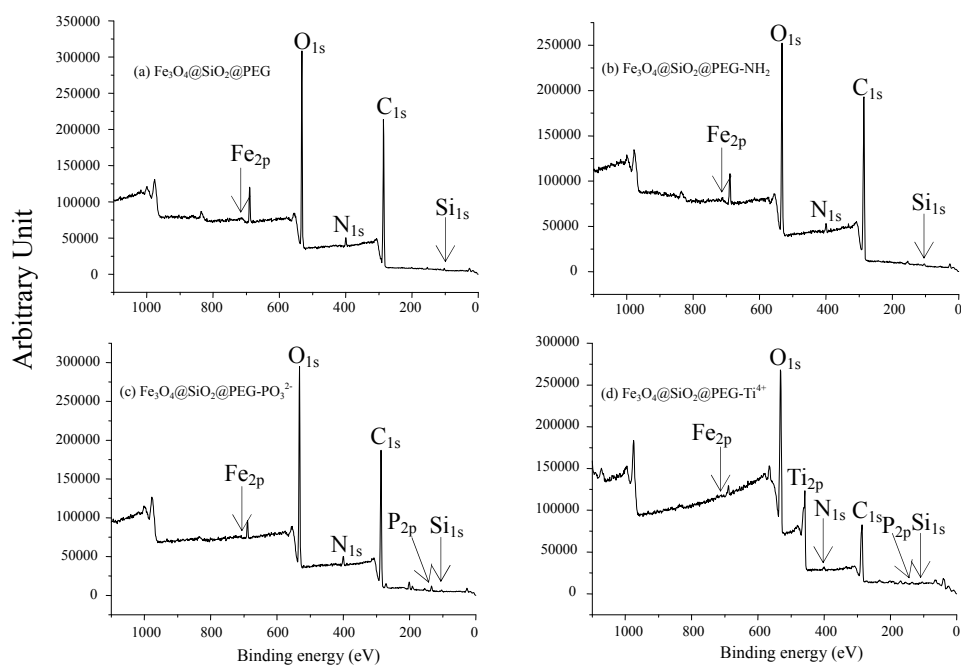

Fig. S4. The EDX spectrum data of  $\text{Fe}_3\text{O}_4@\text{SiO}_2@\text{PEG-Ti}^{4+}$  magnetic nanoparticles.

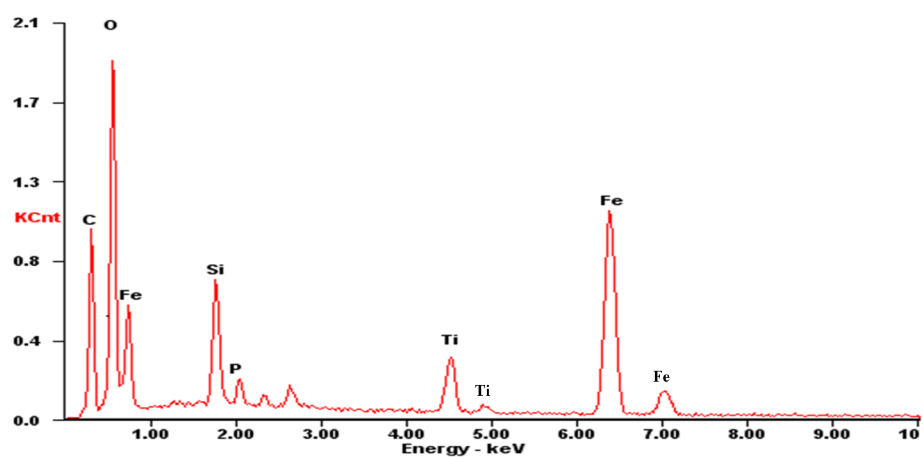



Fig. S5 The hysteresis loops of  $\text{Fe}_3\text{O}_4@\text{SiO}_2@\text{PEG-Ti}^{4+}$  magnetic nanoparticles.

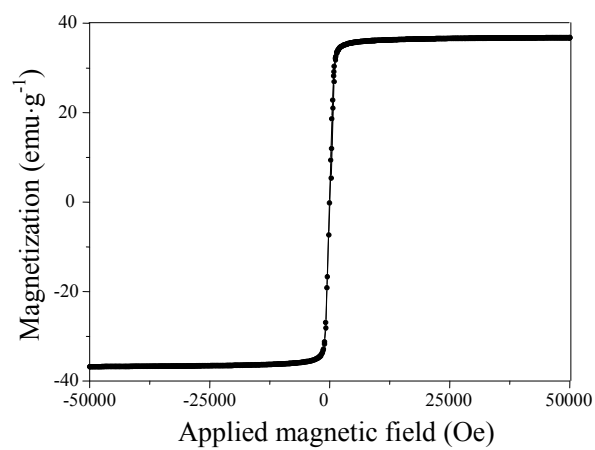

Fig. S6 MALDI-TOF MS analysis of tryptic digests of  $\beta$ -casein (200  $\mu$ L) enriched by  $\text{Fe}_3\text{O}_4@\text{SiO}_2@\text{PEG-Ti}^{4+}$  (a,b,c) and  $\text{Fe}_3\text{O}_4@\text{SiO}_2\text{-Ti}^{4+}$  (d,e,f) IMAC nanoparticles at different concentrations of (i)  $1 \times 10^{-10}$  M, (ii)  $5 \times 10^{-11}$  M and (iii)  $2.5 \times 10^{-11}$  M, respectively.

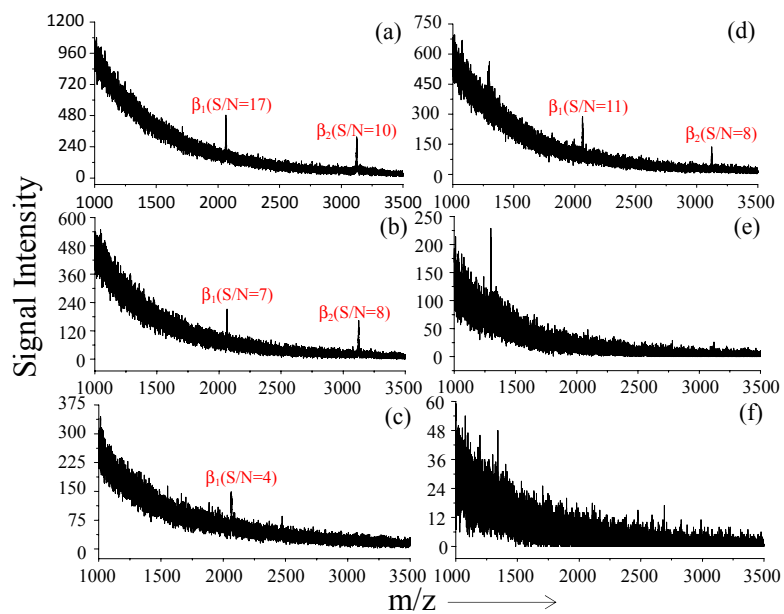

Fig. S7 The distribution of isoelectric points of nonphosphopeptides obtained by using  $\text{Fe}_3\text{O}_4@\text{SiO}_2@\text{PEG-Ti}^{4+}$ ,  $\text{Fe}_3\text{O}_4@\text{SiO}_2\text{-Ti}^{4+}$  IMAC nanoparticles and  $\text{TiO}_2$  microspheres.

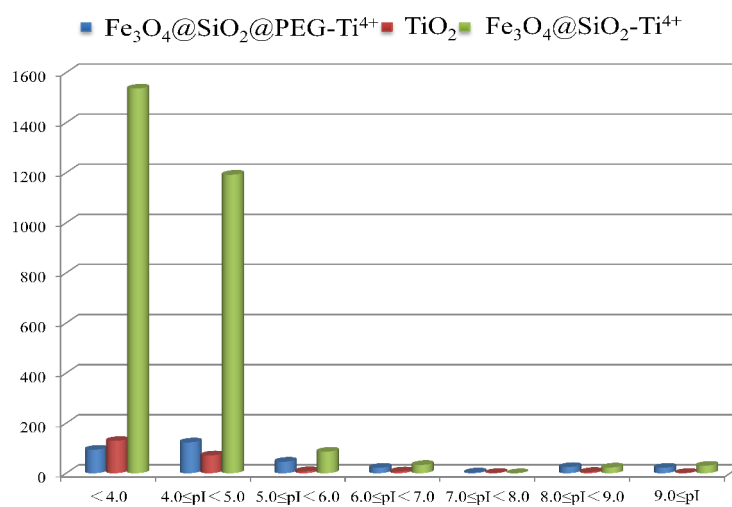

Literature :

1. R. Matsuno, K. Yamamoto, H. Otsuka and A. Takahara, *Macromolecules*, 2004, **37**, 2203-2209.
2. A. P. Majewski, A. Schallon, V. Jerome, R. Freitag, A. H. Muller and H. Schmalz, *Biomacromolecules*, 2012, **13**, 857-866.
